# Supplementary material for: Phyto-Synthesis and Characterization of Silver Nanoparticles Using Box-Behnken Design and Its Anti-Alternaria Activity
Source: MDPI journal article supplement (doi:10.3390/cleantechnol5040068), 2023-11-30
Supplement: s1 [file s1]

**Table S1:** Actual and Predicted coded values of the experimented Box-Behnken Design for particle size and yield.

| pH     | Temperature | Reaction time | Concentration | Particle size (nm) |           | Yield (%) |           |
|--------|-------------|---------------|---------------|--------------------|-----------|-----------|-----------|
|        |             |               |               | Actual             | Predicted | Actual    | Predicted |
| 1.000  | -1.000      | 0.000         | 0.000         | 20.36              | 20.71     | 42.33     | 44.25     |
| -1.000 | 0.000       | 0.000         | 1.000         | 116.49             | 118.50    | 70.33     | 72.91     |
| 0.000  | -1.000      | 0.000         | 1.000         | 110.41             | 109.60    | 52.41     | 51.42     |
| 1.000  | 0.000       | 1.000         | 0.000         | 65.33              | 66.33     | 73.11     | 72.95     |
| -1.000 | 0.000       | -1.000        | 0.000         | 100.11             | 98.12     | 80.14     | 81.66     |
| 0.000  | 1.000       | 1.000         | 0.000         | 80.14              | 80.63     | 87.11     | 85.03     |
| 0.000  | -1.000      | 0.000         | -1.000        | 44.21              | 45.48     | 73.25     | 68.71     |
| -1.000 | 0.000       | 0.000         | -1.000        | 80.11              | 81.80     | 80.11     | 80.47     |
| 0.000  | 0.000       | -1.000        | 1.000         | 75.27              | 76.00     | 83.42     | 79.37     |
| 0.000  | 0.000       | 0.000         | 0.000         | 77.09              | 78.53     | 89.16     | 88.46     |
| 0.000  | -1.000      | -1.000        | 0.000         | 64.98              | 65.40     | 61.21     | 65.15     |
| 0.000  | 0.000       | 1.000         | -1.000        | 89.41              | 88.76     | 90.14     | 90.97     |
| -1.000 | 0.000       | 1.000         | 0.000         | 102.91             | 101.84    | 70.89     | 74.58     |
| 0.000  | 0.000       | -1.000        | -1.000        | 68.23              | 67.21     | 70.13     | 71.85     |
| 0.000  | 1.000       | -1.000        | 0.000         | 75.23              | 77.01     | 70.15     | 69.35     |
| 0.000  | 0.000       | 0.000         | 0.000         | 79.11              | 78.53     | 88.28     | 88.46     |
| 1.000  | 0.000       | 0.000         | 1.000         | 38.03              | 37.26     | 58.65     | 60.15     |
| 0.000  | 0.000       | 0.000         | 0.000         | 79.12              | 78.53     | 88.28     | 88.46     |
| -1.000 | 1.000       | 0.000         | 0.000         | 67.99              | 67.72     | 77.99     | 72.85     |
| 1.000  | 0.000       | 0.000         | -1.000        | 73.02              | 71.92     | 68.14     | 67.42     |
| 0.000  | 1.000       | 0.000         | -1.000        | 110.21             | 110.03    | 72.17     | 74.52     |
| 0.000  | 1.000       | 0.000         | 1.000         | 50.22              | 47.96     | 71.09     | 76.99     |
| 1.000  | 0.000       | -1.000        | 0.000         | 42.41              | 42.49     | 59.80     | 57.48     |
| 0.000  | 0.000       | 0.000         | 0.000         | 79.21              | 78.53     | 88.28     | 88.46     |
| 0.000  | 0.000       | 1.000         | 1.000         | 80.91              | 82.01     | 73.57     | 68.63     |
| 0.000  | 0.000       | 0.000         | 0.000         | 78.11              | 78.53     | 88.28     | 88.46     |
| 1.000  | 1.000       | 0.000         | 0.000         | 87.22              | 87.66     | 66.81     | 66.59     |
| -1.000 | -1.000      | 0.000         | 0.000         | 132.14             | 131.78    | 66.81     | 63.81     |
| 0.000  | -1.000      | 1.000         | 0.000         | 90.21              | 89.34     | 55.19     | 57.85     |
